# Supplementary material for: Co-creating an arts-based eye health education strategy in Zanzibar: process, outcomes and lessons learnt
Source: HighWire-hosted journal article supplement (doi:10.1136/bmjgh-2022-009317), 2022-09-01

Supplemental file 2: Thematic diagram of the main key themes and subthemes emerged from workshop notes analysis

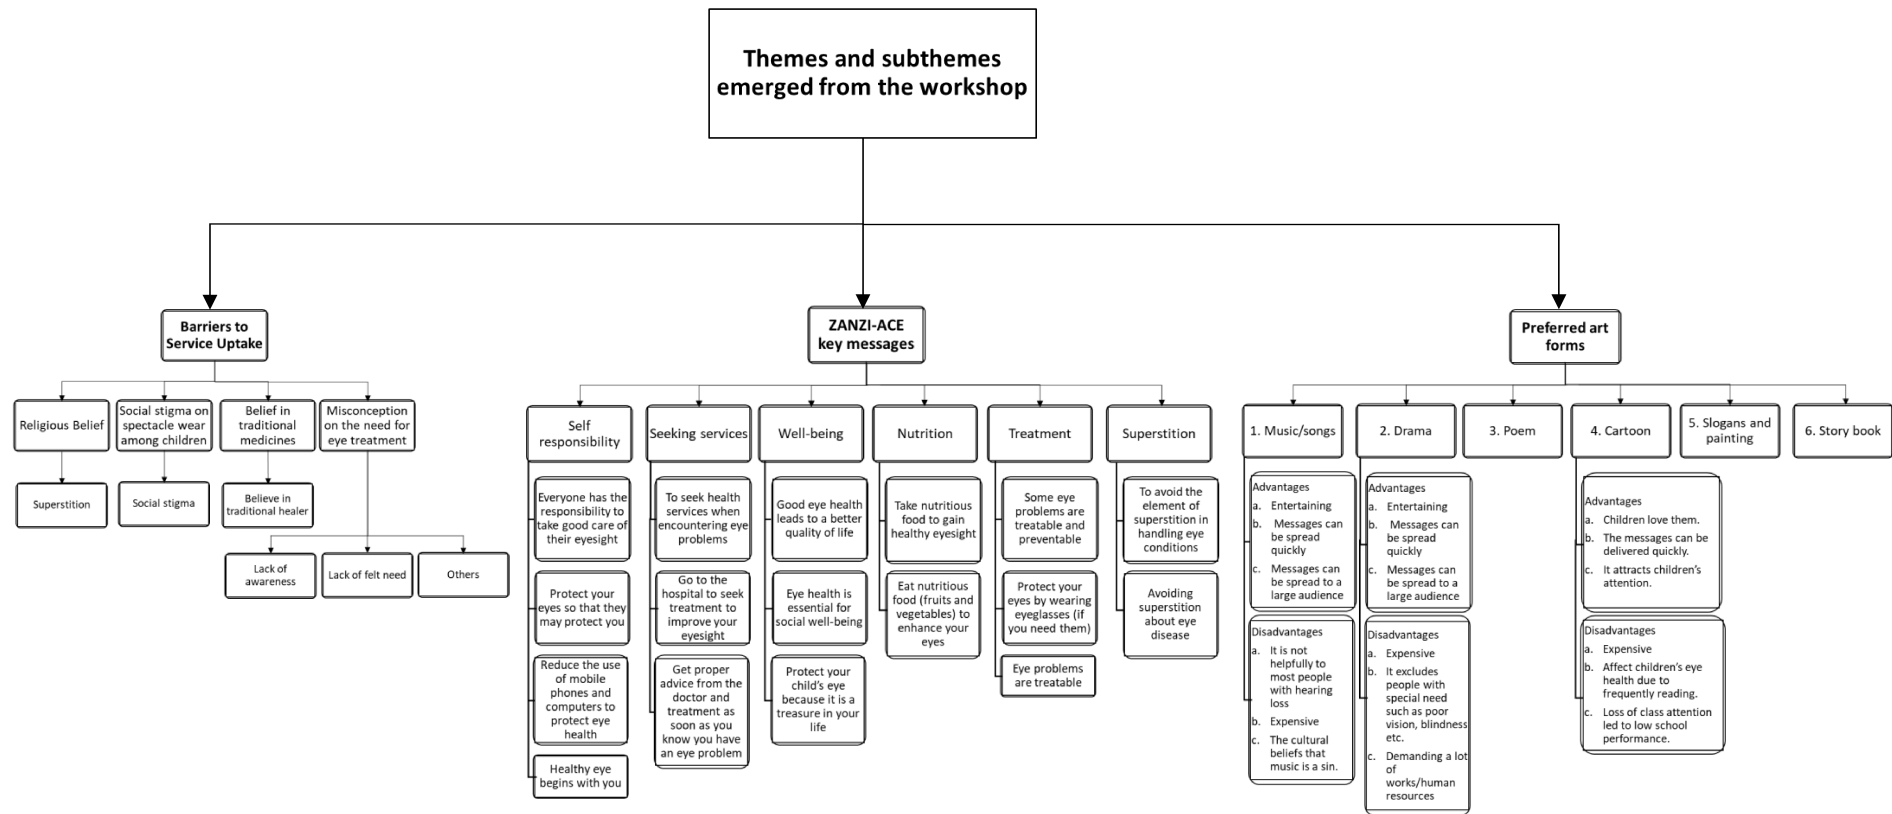

Supplement: bmjgh-2022-009317supp002_data_supplement.pdf [file bmjgh-2022-009317supp002_data_supplement.pdf]
